# Supplementary material for: Elevated Adsorption of Lead and Arsenic over Silver Nanoparticles Deposited on Poly(amidoamine) Grafted Carbon Nanotubes
Source: MDPI journal article supplement (doi:10.3390/nano12213852), 2022-11-01
Supplement: s1 [file s1]

## Supplementary Material

# Elevated Adsorption of Lead and Arsenic over Silver Nanoparticles Deposited on Poly(amidoamine) Grafted Carbon Nanotubes

Gururaj M. Neelgund <sup>1,\*</sup>, Sanjuana F. Aguilar <sup>1</sup>, Mahaveer D. Kurkuri <sup>2</sup>, Debora F. Rodrigues <sup>3</sup> and Ram L. Ray <sup>4</sup>

<sup>1</sup> Department of Chemistry, Prairie View A&M University, Prairie View, TX 77446, USA

<sup>2</sup> Centre for Research in Functional Materials (CRFM), JAIN University, Jain Global Campus, Bengaluru 562112, Karnataka, India

<sup>3</sup> Department of Civil and Environmental Engineering, University of Houston, Houston, TX 77004, USA

<sup>4</sup> College of Agriculture and Human Sciences, Prairie View A&M University, Prairie View, TX 77446, USA

\* Correspondence: gmneelgund@pvamu.edu

**Table S1:** Parameters calculated from the intra-particle diffusion plot provided in Figure S2.

| Adsorbent | Intra-particle diffusion model           |         |                |                                          |        |                |
|-----------|------------------------------------------|---------|----------------|------------------------------------------|--------|----------------|
|           | $K_{id-1}$<br>mg/(g.min <sup>0.5</sup> ) | c       | R <sup>2</sup> | $k_{id-2}$<br>mg/(g.min <sup>0.5</sup> ) | c      | R <sup>2</sup> |
| Pb(II)    | 0.6587                                   | 0.0920  | 0.9797         | $1.32 \times 10^{-16}$                   | 2.5000 | -              |
| As(III)   | 0.4874                                   | -0.0547 | 0.9873         | 0.0472                                   | 2.0649 | 0.7141         |

**Table S2:** Comparison of maximum adsorption capacity ( $q_m$ ) of CNTs–PAMAM–Ag estimated for Pb(II) and As(III) adsorption with different adsorbents.

| Adsorbent                                | Adsorbate | maximum                             | pH  | Ref       |
|------------------------------------------|-----------|-------------------------------------|-----|-----------|
|                                          |           | adsorption capacity<br>$q_m$ (mg/g) |     |           |
| CNTs–PAMAM–Ag                            | Pb(II)    | 18.7                                | 7.7 | This work |
| 6O-MWCNTs@Fe <sub>3</sub> O <sub>4</sub> | Pb(II)    | 215.05                              | 6.0 | 42        |
| MWCNTs/ThO <sub>2</sub>                  | Pb(II)    | 178.25                              | 5.5 | 75        |
| 50%CNTs/Fe <sub>3</sub> O <sub>4</sub>   | Pb(II)    | 40.88                               | 6.2 | 76        |
| CNTs                                     | Pb(II)    | 102.04                              | 5.0 | 77        |
| CS-MA-DETA                               | Pb(II)    | 239.2                               | 5.0 | 78        |
| CNTs–PAMAM–Ag                            | As(III)   | 14.8                                | 8.1 | This work |
| HDTMA-Al-bentonite                       | As(III)   | 2.24                                | 4.5 | 79        |
| Iron-impregnated charred GAP             | As(III)   | 3.25                                | 7.0 | 80        |
| Aluminum pillared HDTMA sericite         | As(III)   | 0.40                                | 4.5 | 81        |
| CTMAB-Fe-Montmorillonite                 | As(III)   | 11.36                               | 6.5 | 82        |
| Fe/Mn-HDTMA kaolin                       | As(III)   | 7.99                                | 6.5 | 4         |

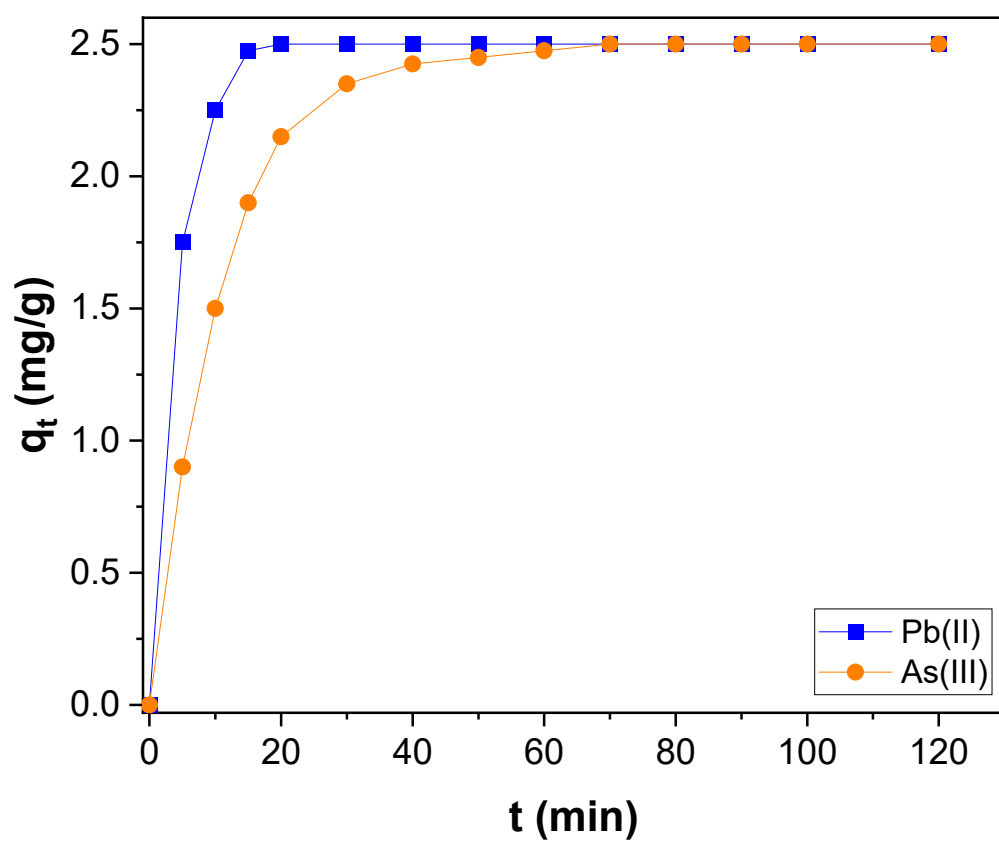

**Figure S1:** Plot perceived  $q_t$  as a function of time for Pb(II) and As(III) adsorption over CNTs-PAMAM-Ag.

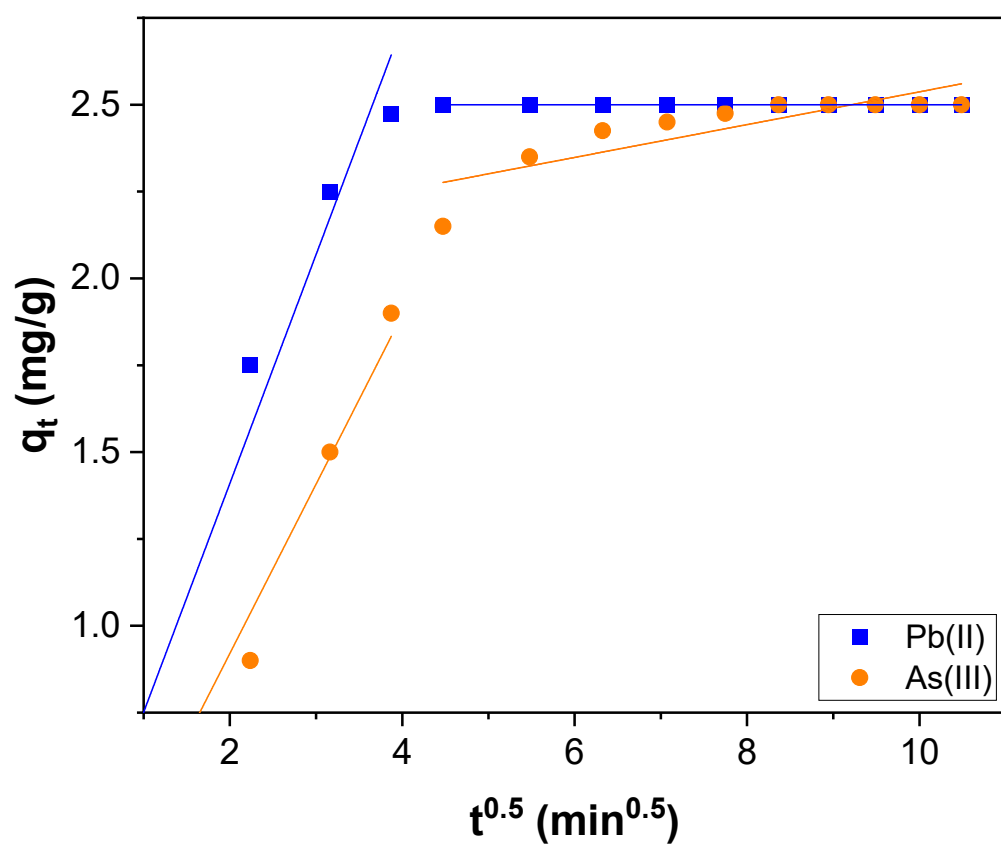

**Figure S2:** Intraparticle diffusion model for Pb(II) and As(III) adsorption over CNTs-PAMAM-Ag.

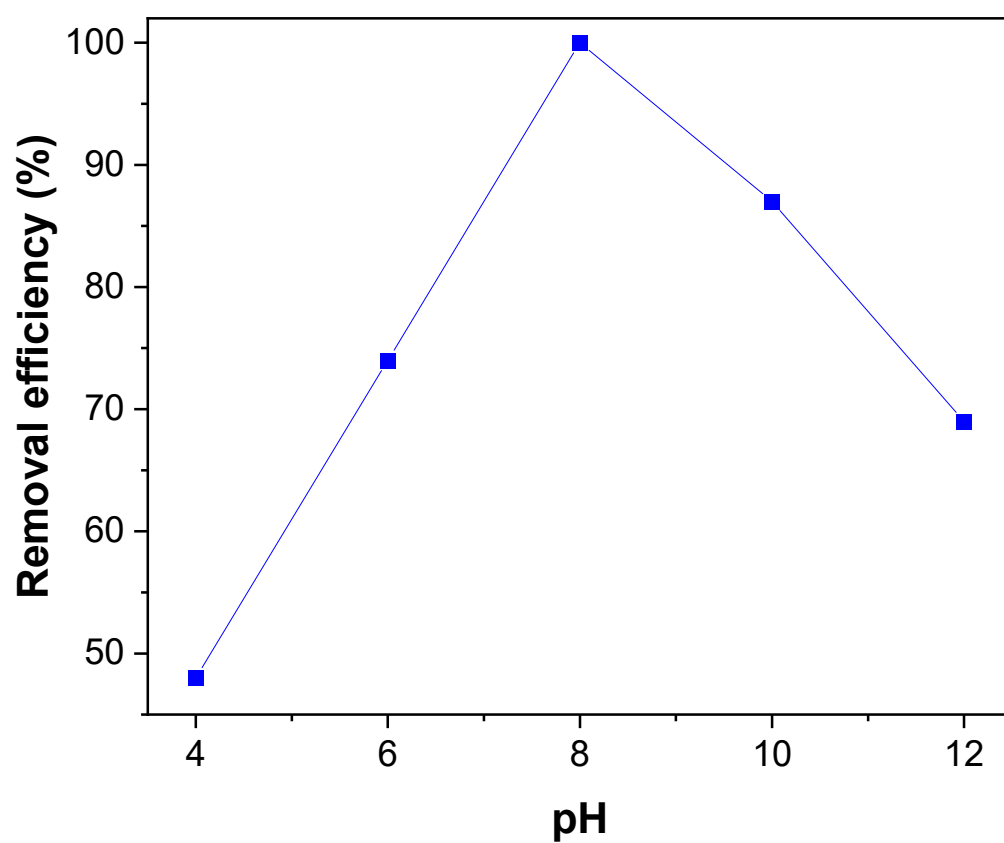

**Figure S3:** Effect of pH on the adsorption of Pb(II) over CNTs-PAMAM-Ag.

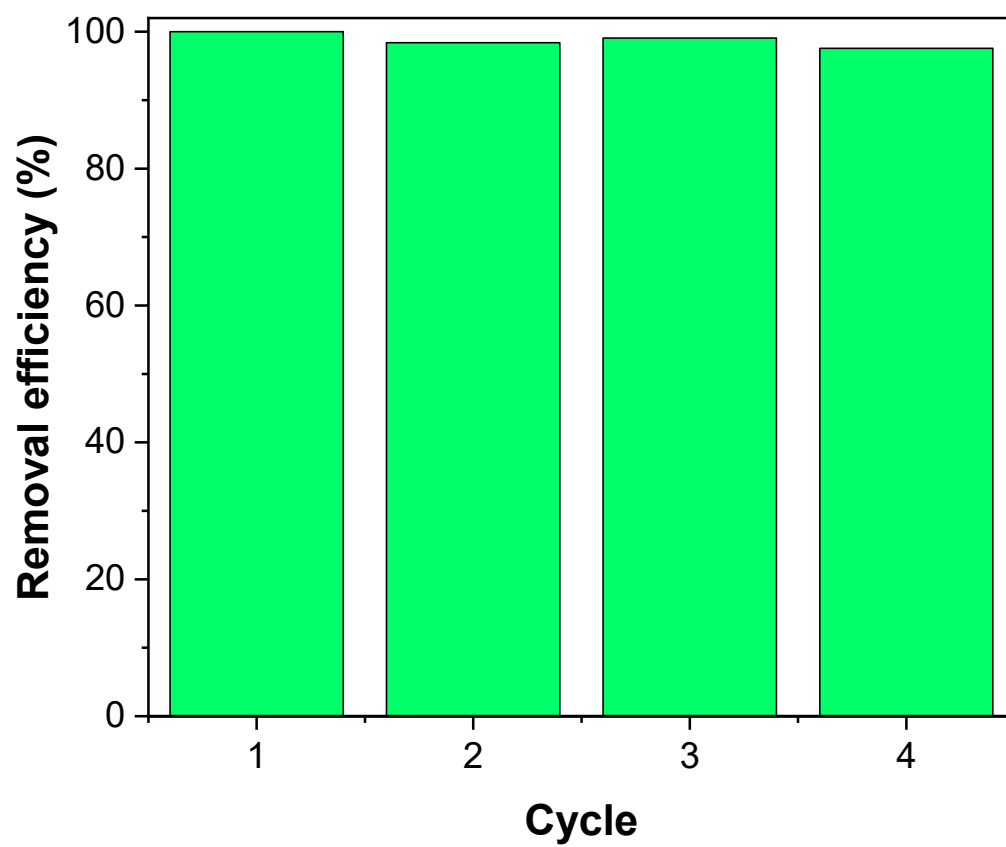

**Figure S4:** Efficiency of CNTs–PAMAM–Ag in the adsorption of Pb(II) for four successive cycles.
